# Supplementary material for: Phosphorus pentoxide as a cost-effective, metal-free catalyst for ring opening polymerization of ε-caprolactone
Source: Royal Society of Chemistry journal article supplement (doi:10.1039/d0ra04251j), 2020-01-01
Supplement: d0ra04251j1.pdf [file d0ra04251j1.pdf]

## Phosphorus pentoxide as a cost-effective, metal-free catalyst for ring opening polymerization of $\epsilon$ -caprolactone

Ismail Adoumaz,<sup>a,b</sup> El Hassan Boutrouia,<sup>a</sup> Redouane Beniazza,<sup>c</sup> Hicham Qayouh,<sup>a</sup> Abdelkrim El Kadib,<sup>d</sup> Abdel Khoukh,<sup>b</sup> Maud Save,<sup>b</sup> and Mohammed Lahcini.<sup>a,c\*</sup>

<sup>a</sup> IMED-Lab, Cadi Ayyad University, Marrakesh 40000, Morocco , Faculté des Sciences et Techniques Gueliz, Université Cadi Ayyad, Av. Abdelkrim Khattabi BP 549, 40000 Marrakech, Morocco

<sup>b</sup> CNRS, University Pau & Pays Adour, E2S UPPA, Institut des Sciences Analytiques et de Physico-Chimie pour l'Environnement et les Matériaux, IPREM, UMR5254, 64000, Pau, France

<sup>c</sup> Mohammed VI Polytechnic University, Lot 660, Hay Moulay Rachid, 43150, Ben Guerir, Morocco

<sup>d</sup> Euro-Med Research Institute, Engineering Division, Euro-Mediterranean University of Fes (UEMF), Fez-Shore, Route de SidiHrazem, 30070, Fez, Morocco

### Supporting Information available

|                       |   |
|-----------------------|---|
| 1.NMR analysis        | 2 |
| 2.SEC Analysis        | 3 |
| 3. Thermal properties | 4 |

## 1. NMR analysis

### a- Conversion calculations

The  $^1\text{H}$  NMR analysis of the crude samples in  $\text{CDCl}_3$  allows to evaluate the conversion by comparing the signals of protons  $-\text{CH}_2 \epsilon'$  of  $\epsilon\text{-CL}$  and those  $\epsilon$  of PCL; according to the formula

$$\text{Conv (\%)} = [A_{\epsilon} / A (\epsilon + \epsilon')] * 100.$$

In a second step, the products purified by precipitation in cold methanol and dried at room temperature in the vacuum oven were analyzed by  $^1\text{H}$  NMR in  $\text{CDCl}_3$  and analysed by SEC in THF to obtain their mass distribution.

### b- $^{13}\text{C}$ NMR Spectra of PCL

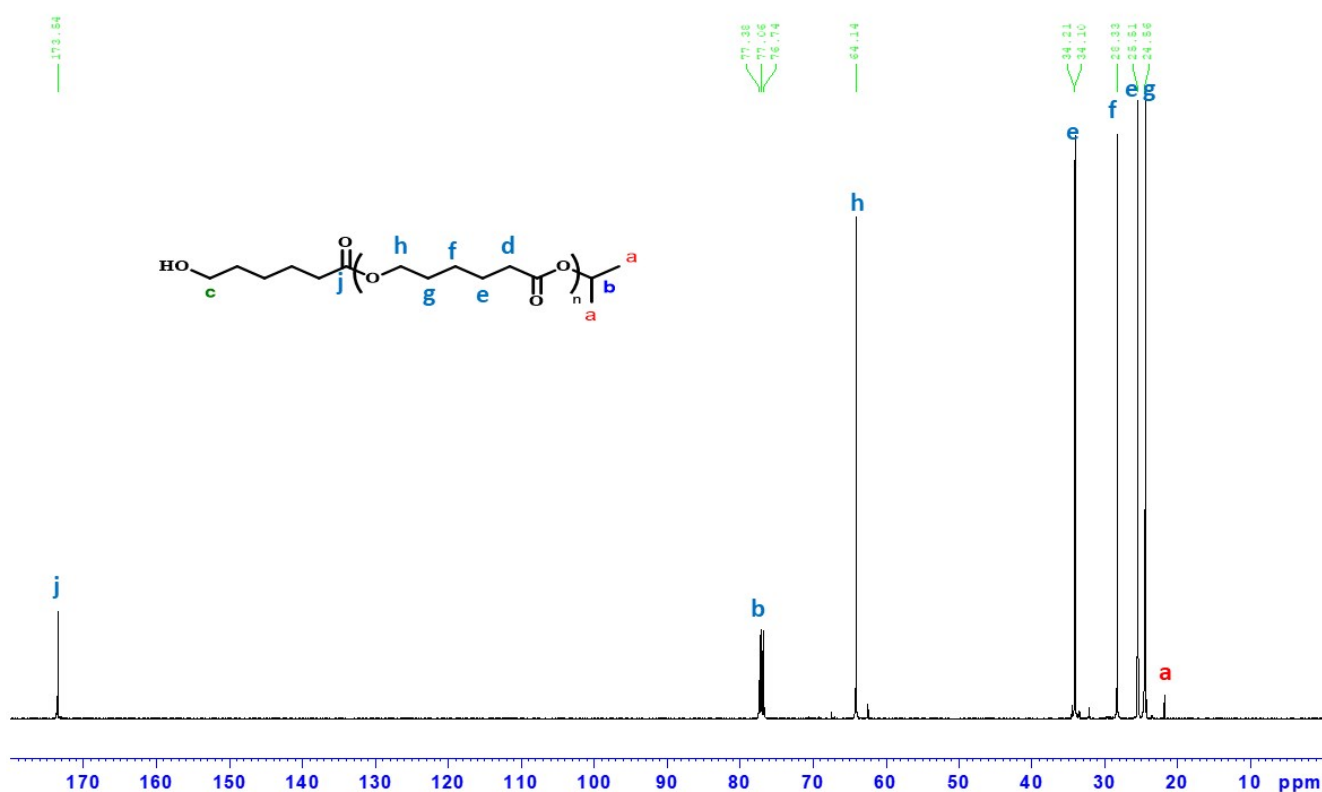

Figure 1.  $^{13}\text{C}$  NMR spectra of the obtained PCL in  $\text{CDCl}_3$  solvent

### c- <sup>1</sup>H NMR spectras of chain extension experiment of CL polymerization

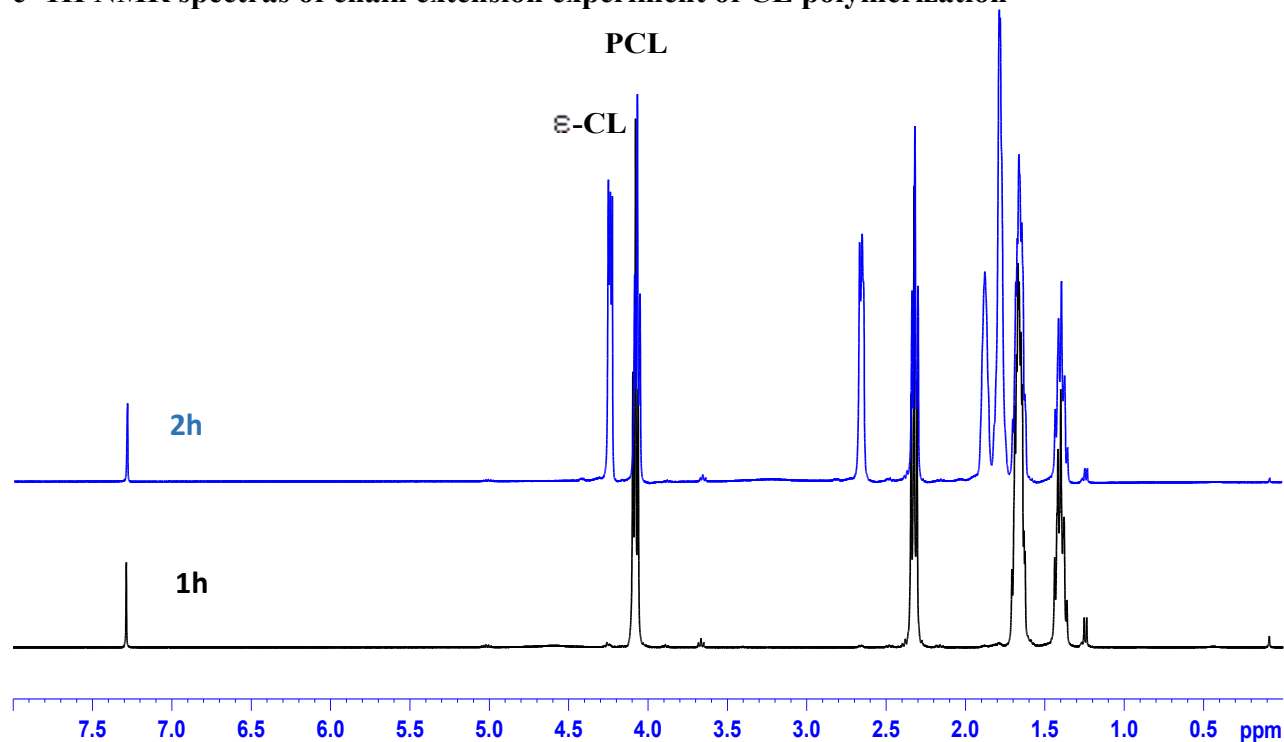

Figure 2: <sup>1</sup>H NMR spectras of PCL in CDCl<sub>3</sub> after 100% conversion of [ε-CL]<sub>0</sub>/[P<sub>2</sub>O<sub>5</sub>]<sub>0</sub>/[iPrOH]<sub>0</sub> = 50/1/1 (black line) and after 50% conversion of 100 equivalents of ε-CL compared to isopropanol and P<sub>2</sub>O<sub>5</sub> (blue line)

### 2. SEC Analysis of chain extension experiment of CL polymerization

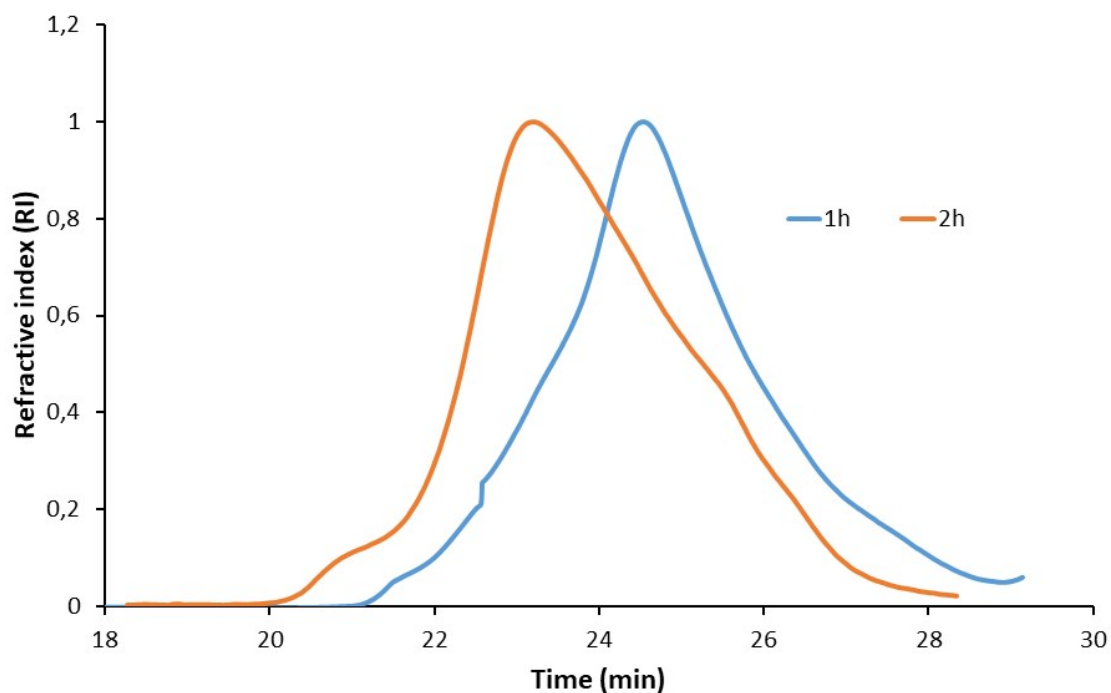

Figure 3: SEC curves of PCL made with P<sub>2</sub>O<sub>5</sub>/iPrOH, orange line final product ( $M_n = 11800 \text{ g mol}^{-1}$ ) and blue line prepolymer ( $M_n = 7505 \text{ g mol}^{-1}$ )

### 3. Thermal properties

#### a- Differential Scanning Calorimetry (DSC) Analysis:

The tests were carried out using a Perkin Elmer Jade DSC under a stream of Gas Nitrogen purge flow: 20.0 ml/min, with a temperature ramp of 10 °C/min. The samples used have a mass of between 7 -10 mg analysed in a temperature range of -60°C to 100 °C.

#### b- Thermogravimetric analysis (TGA):

The TGA was performed to determine the thermal stability of polymer materials. TGA was performed by using the TA Instruments Q500 analyser at heating rate of 10 °C min<sup>-1</sup> under nitrogen atmosphere (80 cm<sup>3</sup> min<sup>-1</sup>).

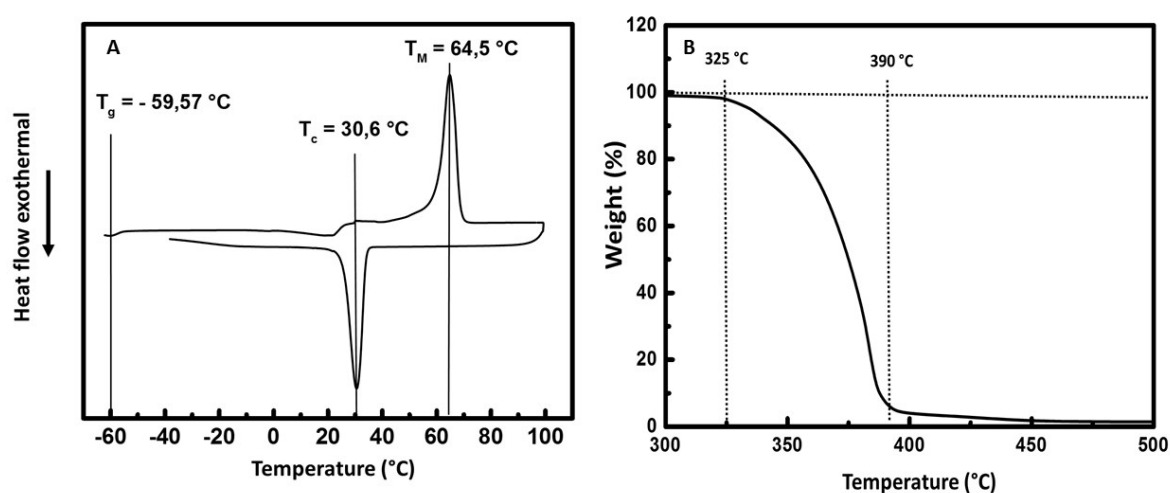

Figure 4: A: DSC curve of PCL prepared by ROP of  $\epsilon$ -CL (at 100 °C in bulk,  $[\text{CL}]_0/[\text{P}_2\text{O}_5]/[\text{iPrOH}]=200:1:1$ ) with the conv. of 98% and (b) TGA thermograms of PCL
